# Supplementary material for: Novel flexible biphenyl PfDHFR inhibitors with improved antimalarial activity
Source: Royal Society of Chemistry journal article supplement (doi:10.1039/d4md00197d), 2024-01-01
Supplement: d4md00197d1.pdf [file d4md00197d1.pdf]

## Supplementary Materials

Table S1. Data collection and refinement statistics of the ternary complexes of *Pf*DHFR-TS V1/S.

|                                     | <b>FB8</b>                                            | <b>FB6</b>                                            |
|-------------------------------------|-------------------------------------------------------|-------------------------------------------------------|
| PDB ID code                         | 8YQ8                                                  | 8YQ9                                                  |
| <i>Data collection</i>              |                                                       |                                                       |
| Wavelength (Å)                      | 1.5418                                                | 1.5418                                                |
| Space group                         | <i>P</i> 2 <sub>1</sub> 2 <sub>1</sub> 2 <sub>1</sub> | <i>P</i> 2 <sub>1</sub> 2 <sub>1</sub> 2 <sub>1</sub> |
| Molecules/ASU                       | 2                                                     | 2                                                     |
| Unit-Cell Parameters                |                                                       |                                                       |
| <i>a b c</i> (Å)                    | 57.763 156.41 165.065                                 | 58.064 156.496 164.865                                |
| $\alpha \beta \gamma$ (deg)         | 90 90 90                                              | 90 90 90                                              |
| Resolution <sup>a</sup> (Å)         | 26.1–2.1 (2.2–2.1)                                    | 24.55–2.4 (2.5–2.4)                                   |
| Completeness (%)                    | 99.7 (100)                                            | 99.5 (100.0)                                          |
| Redundancy                          | 5.9 (4.9)                                             | 5.9 (5.6)                                             |
| $\langle I/\sigma(I) \rangle$       | 13.5 (2.4)                                            | 9.1 (2.0)                                             |
| CC(1/2)                             | 0.998 (0.915)                                         | 0.995 (0.873)                                         |
| Wilson B-factor                     | 26.8                                                  | 30.84                                                 |
| $R_{\text{merge}}^b$                | 0.077 (0.479)                                         | 0.127 (0.483)                                         |
| <i>Refinement</i>                   |                                                       |                                                       |
| $R_{\text{work}}/R_{\text{free}}^c$ | 0.1945 / 0.2404                                       | 0.217 / 0.2909                                        |
| Average B-factors (Å <sup>2</sup> ) |                                                       |                                                       |
| Chains A, B                         |                                                       |                                                       |
| Protein                             | 32.2, 38.9                                            | 37.8, 47.8                                            |
| Drg                                 | 36.5, 66.9                                            | 33.3, 63.5                                            |
| NDP                                 | 28.5, 64.0                                            | 38.0, 83.5                                            |
| UMP                                 | 35.0, 40.1                                            | 73.4, 83.6                                            |
| GOL                                 | -                                                     | 43.5, 40.5                                            |
| Water                               | 35.5                                                  | 33.5                                                  |
| R.m.s. deviation                    |                                                       |                                                       |
| Bond lengths (Å)                    | 0.0092                                                | 0.0087                                                |
| Bond angles (°)                     | 1.8340                                                | 1.8186                                                |
| Ramachadran Plot                    |                                                       |                                                       |
| favored (%)                         | 97.6                                                  | 96.4                                                  |
| allowed (%)                         | 2.4                                                   | 3.6                                                   |
| outlier (%)                         | -                                                     | -                                                     |

<sup>a</sup>Values in parentheses are for the highest-resolution shell.

<sup>b</sup> $R_{\text{merge}} = \frac{\sum_{hkl} \sum_i |I_i(hkl) - \langle I(hkl) \rangle|}{\sum_{hkl} \sum_i I_i(hkl)}$ , where  $I_i(hkl)$  is the intensity of an individual reflection and  $\langle I(hkl) \rangle$  is the mean intensity of symmetry-equivalent reflections.

<sup>c</sup> $R_{\text{work}} = \frac{\sum_{hkl} ||F_{\text{obs}}| - |F_{\text{calc}}||}{\sum_{hkl} |F_{\text{obs}}|}$ , where  $F_{\text{obs}}$  and  $F_{\text{calc}}$  are the observed and calculated structure-factor amplitudes, respectively.  $R_{\text{free}}$  was calculated in the same manner as  $R_{\text{work}}$  but using only a 5% unrefined subset of the reflection data.

Table S2. Docking scores obtained for the lead compounds against QM and WT *PfDHFR* and *HsDHFR*.

| Compound | Docking score (kcal/mol) |                  |               |
|----------|--------------------------|------------------|---------------|
|          | QM <i>PfDHFR</i>         | WT <i>PfDHFR</i> | <i>HsDHFR</i> |
| FB1      | -11.24                   | -10.33           | -9.12         |
| FB2      | -10.51                   | -11.0            | -7.34         |
| FB3      | -9.37                    | -8.88            | -8.69         |
| FB4      | -10.27                   | -10.37           | -7.71         |
| FB5      | -9.83                    | -9.00            | -5.79         |
| FB6      | -9.913                   | -9.88            | -6.53         |
| FB7      | -9.97                    | -7.52            | -5.69         |
| FB8      | -9.69                    | -11.33           | -7.47         |

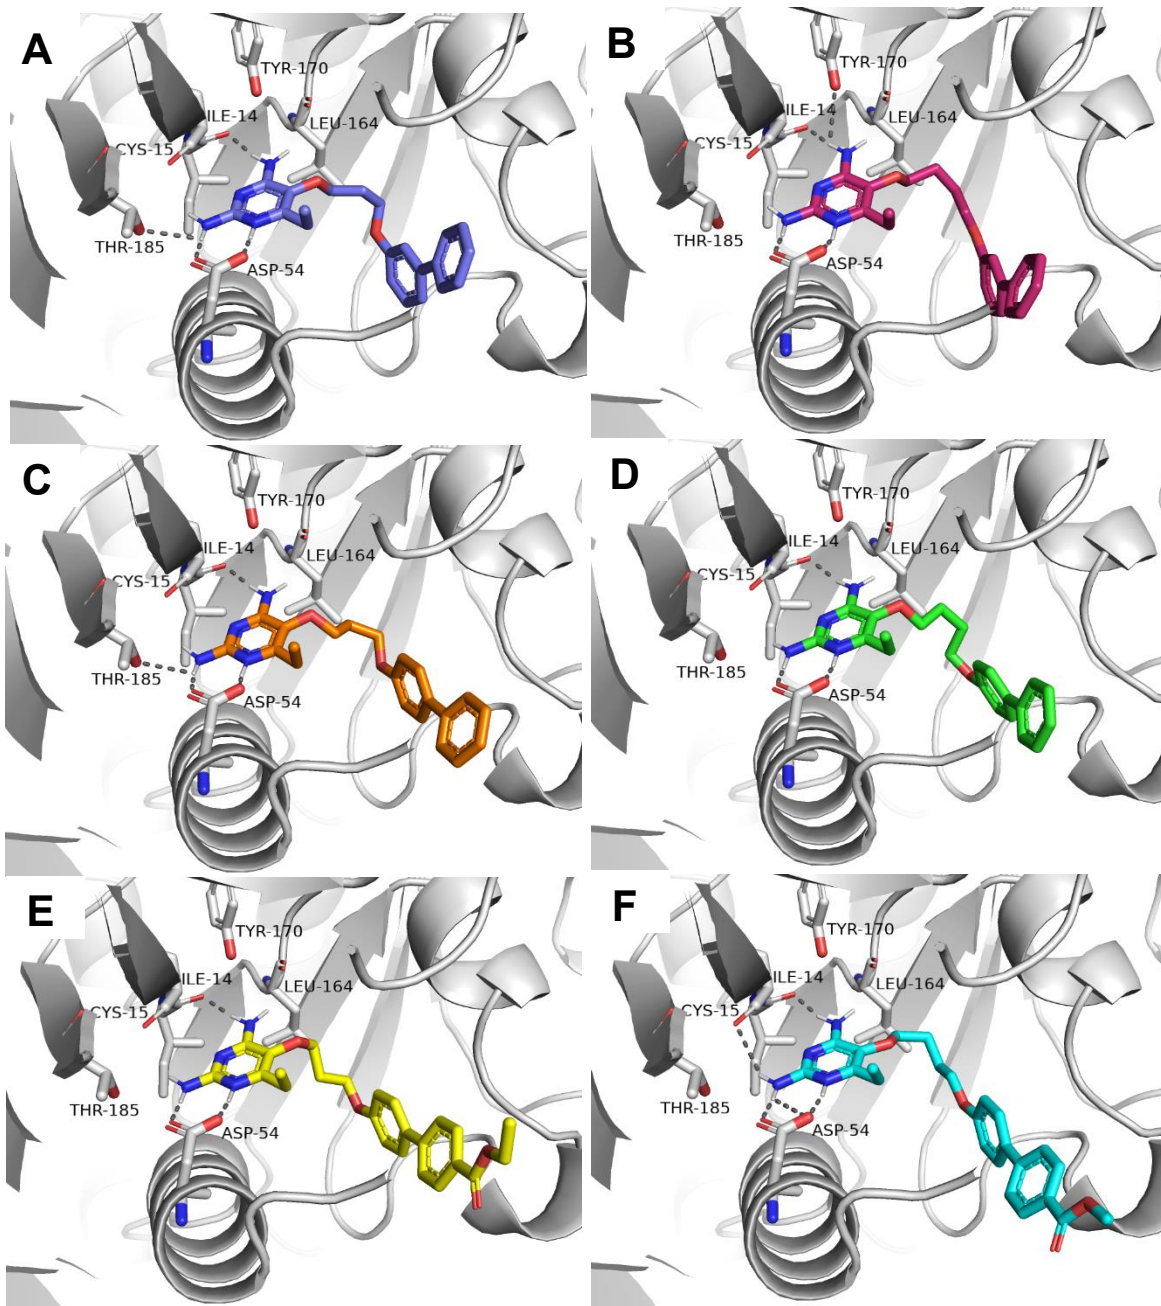

Figure S1. Individual molecular docking poses obtained for lead compounds in QM *PfdHFR*. (A) FB1, (B) FB2, (C) FB3, (D) FB4, (E) FB5, (F) FB7.

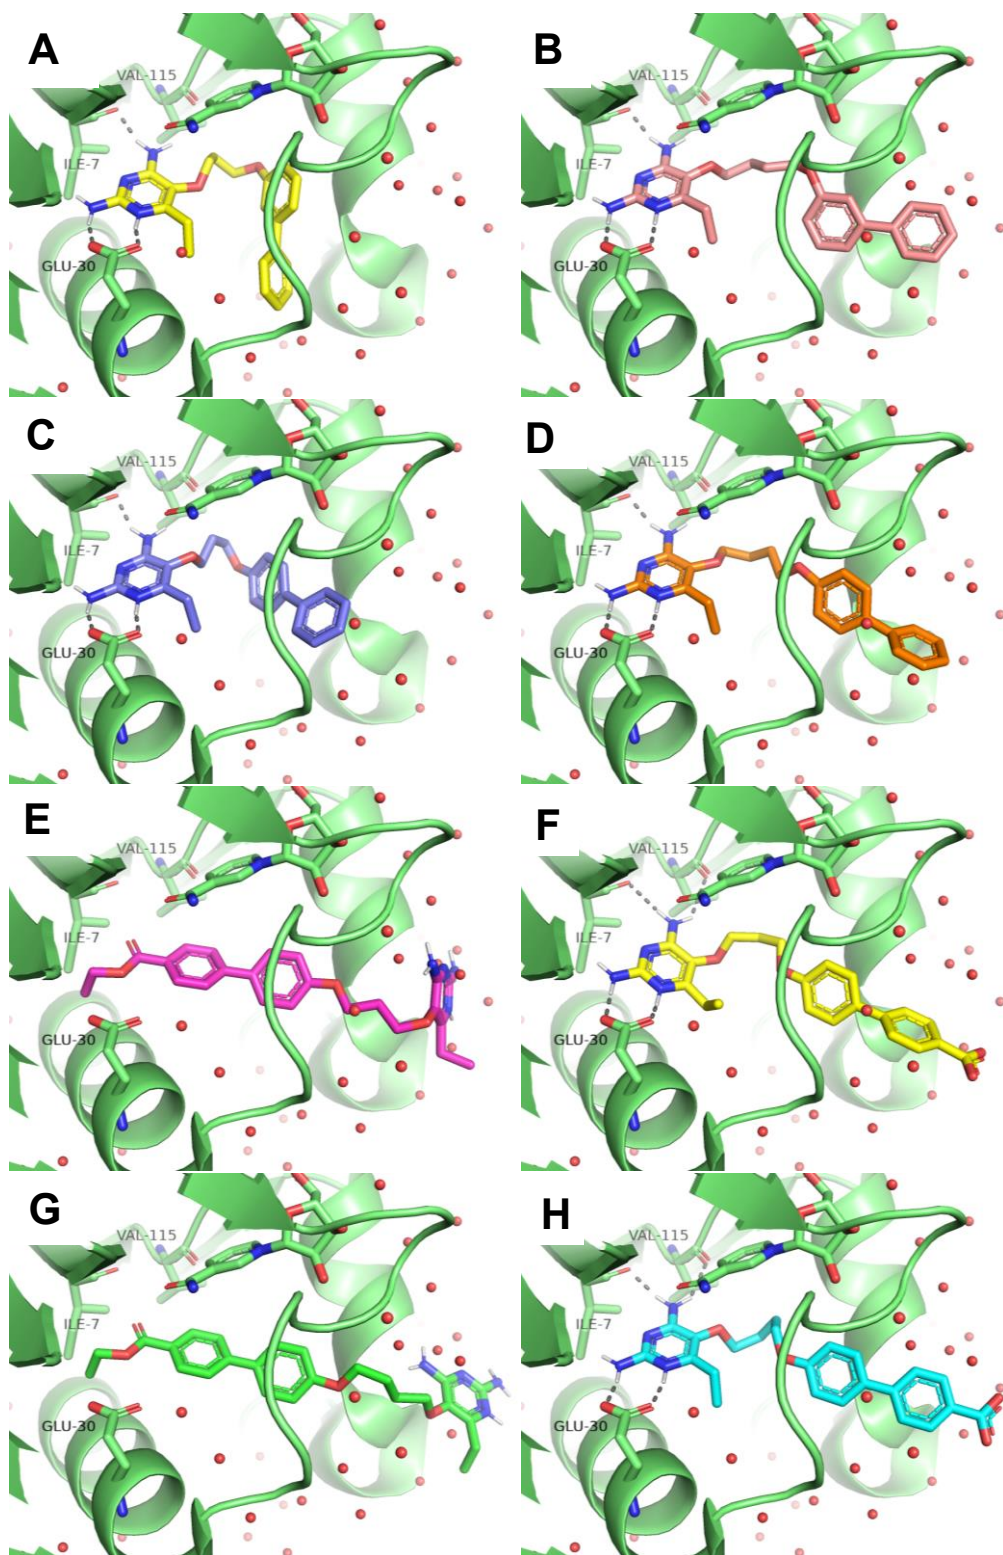

Figure S2. Individual molecular docking poses obtained for lead compounds in *HsDHFR*. (A) FB1, (B) FB2, (C) FB3, (D) FB4, (E) FB5, (F) FB6, (G) FB7, (H) FB8.





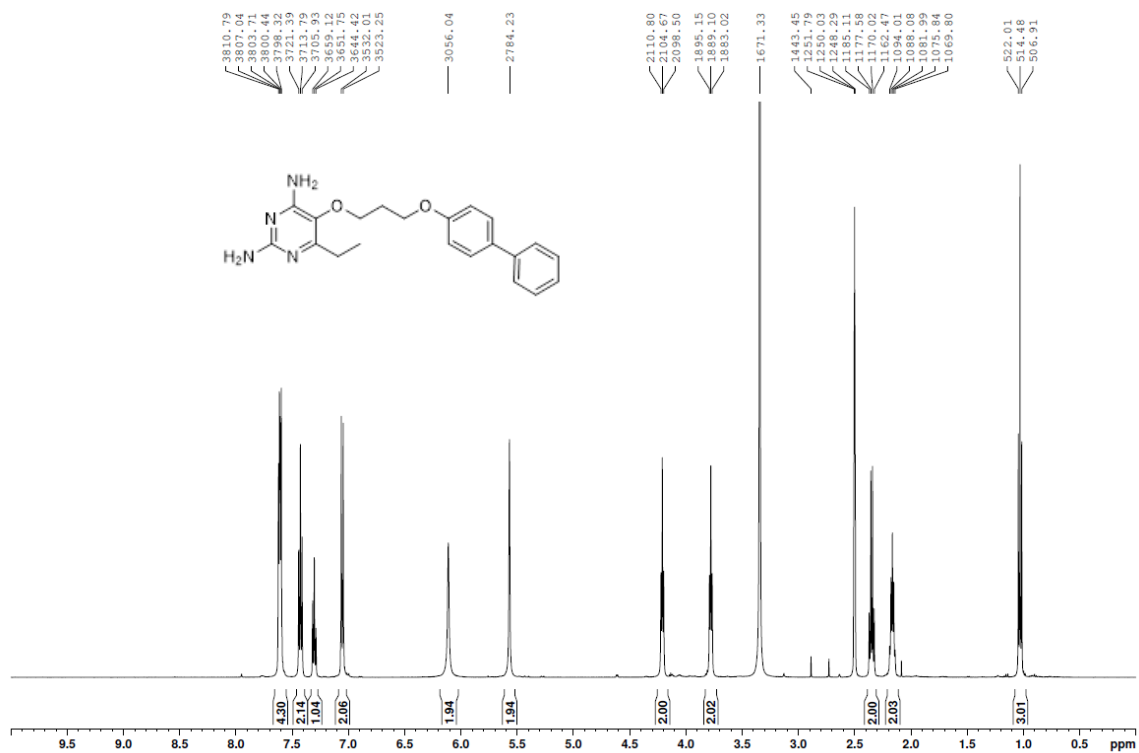

Figure S7. <sup>1</sup>H NMR spectrum of compound 16.

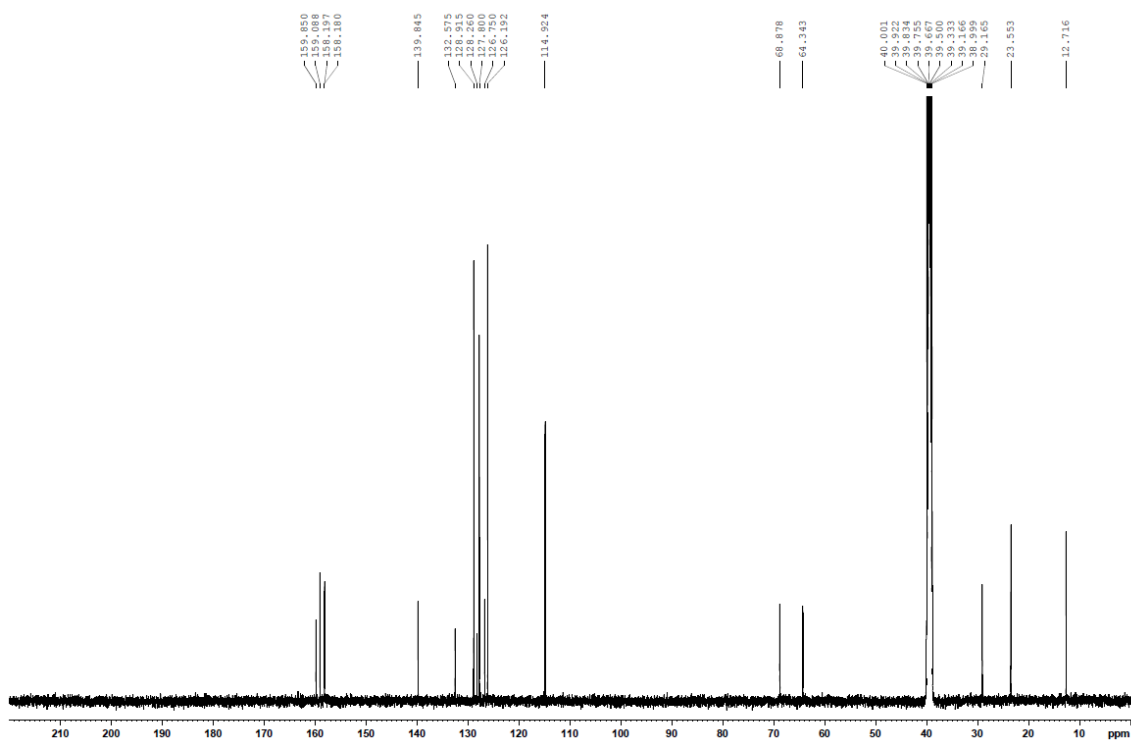

Figure S8. <sup>13</sup>C NMR spectrum of compound 16.

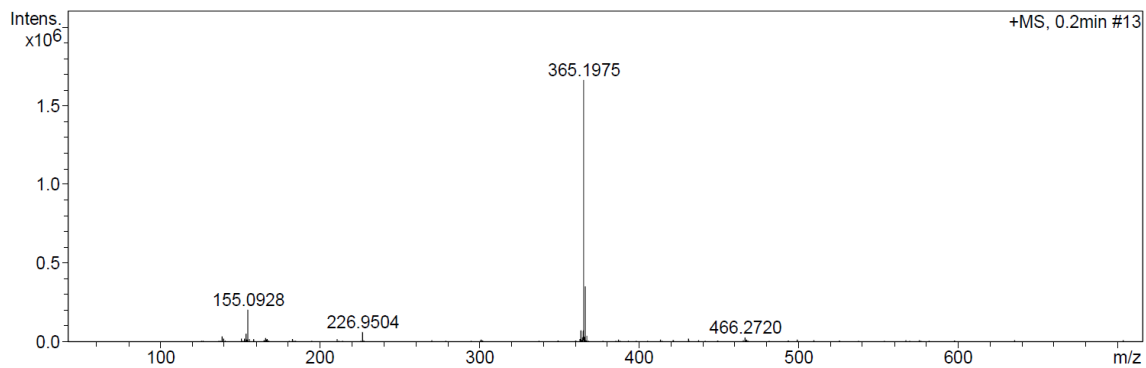

Figure S9. HRMS spectrum of compound 16.

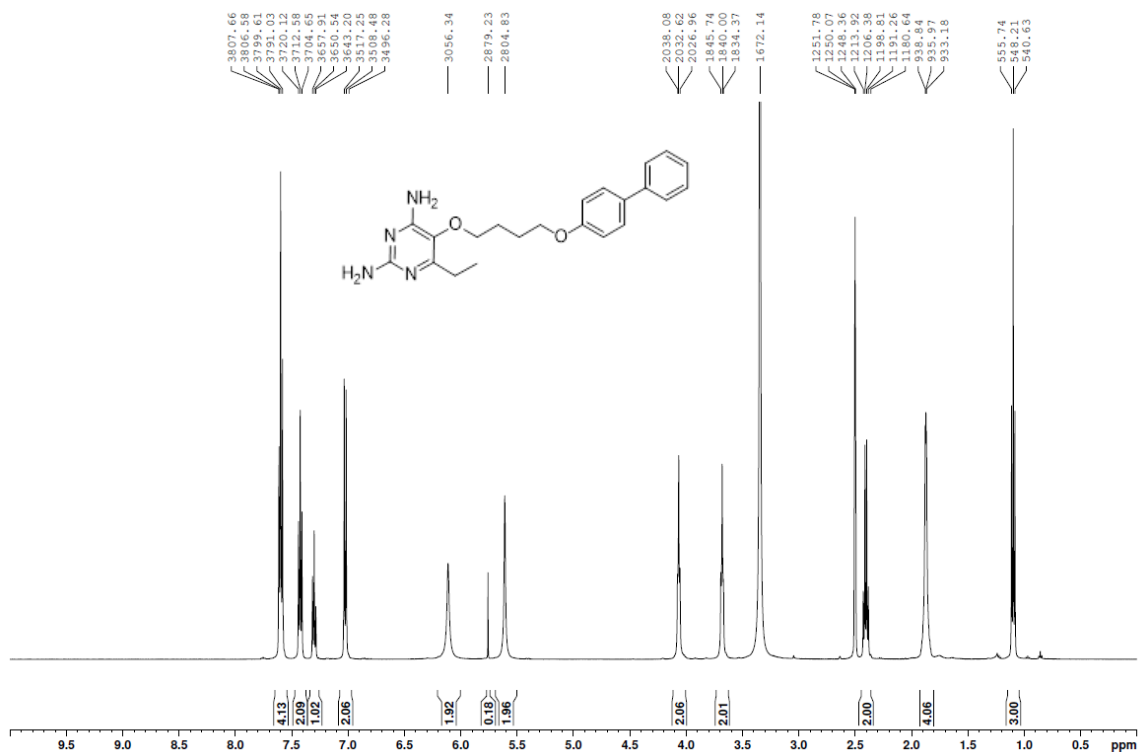

Figure S10.  $^1\text{H}$  NMR spectrum of compound 17.





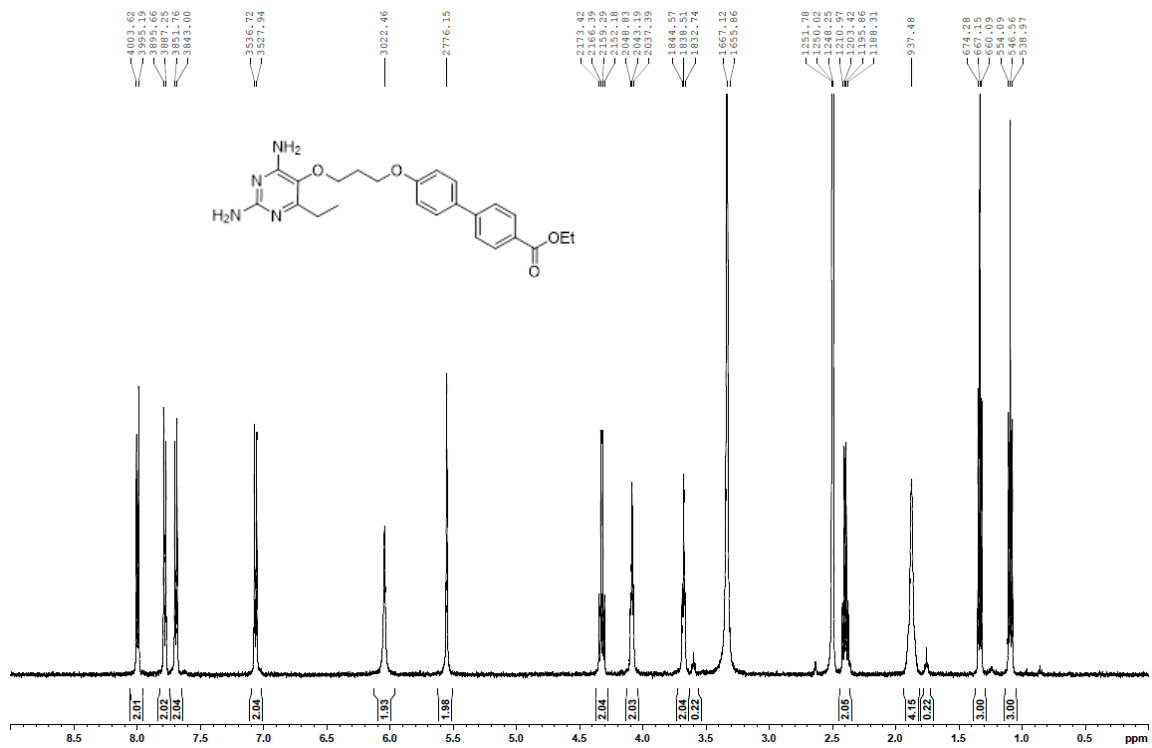

Figure S13. <sup>1</sup>H NMR spectrum of compound 18.

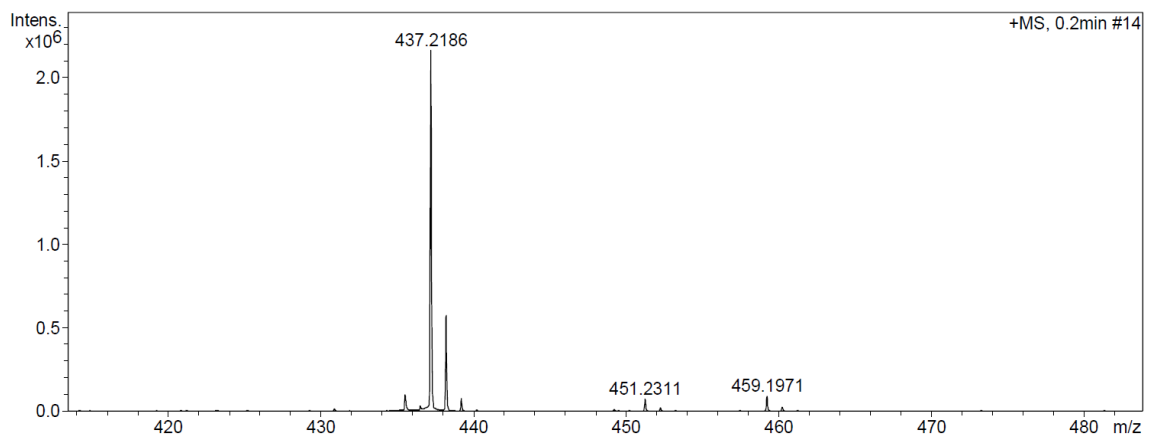

Figure S14. HRMS spectrum of compound 18.

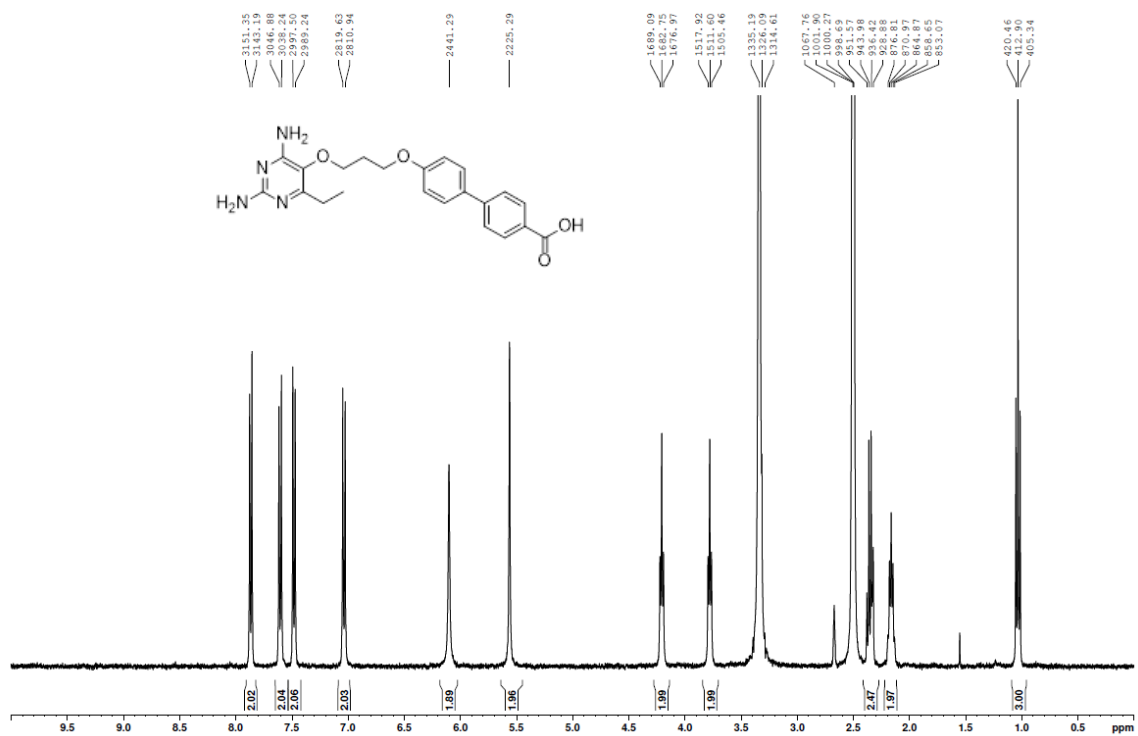

Figure S15. <sup>1</sup>H NMR spectrum of compound 19.

Spectrum View

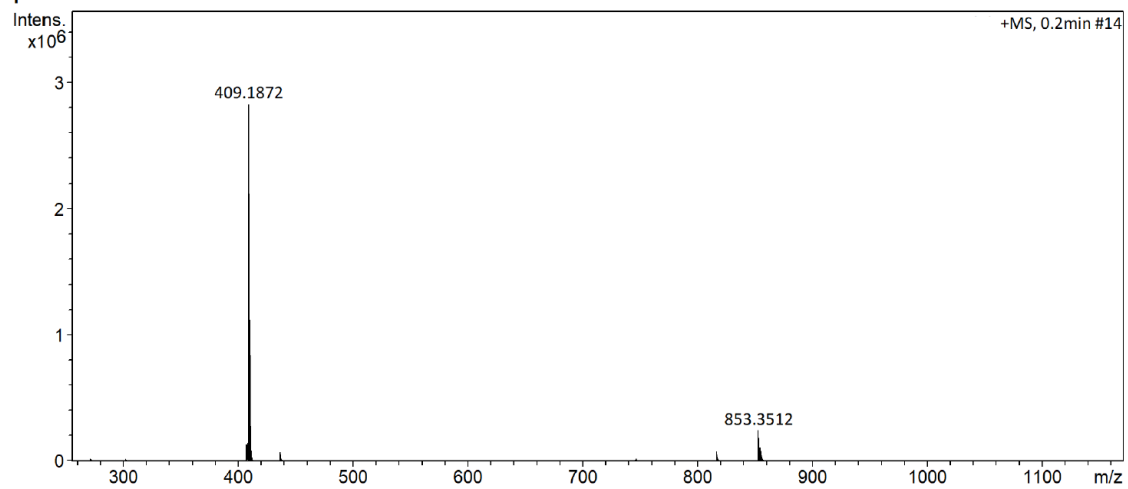

Figure S16. HRMS spectrum of compound 19.



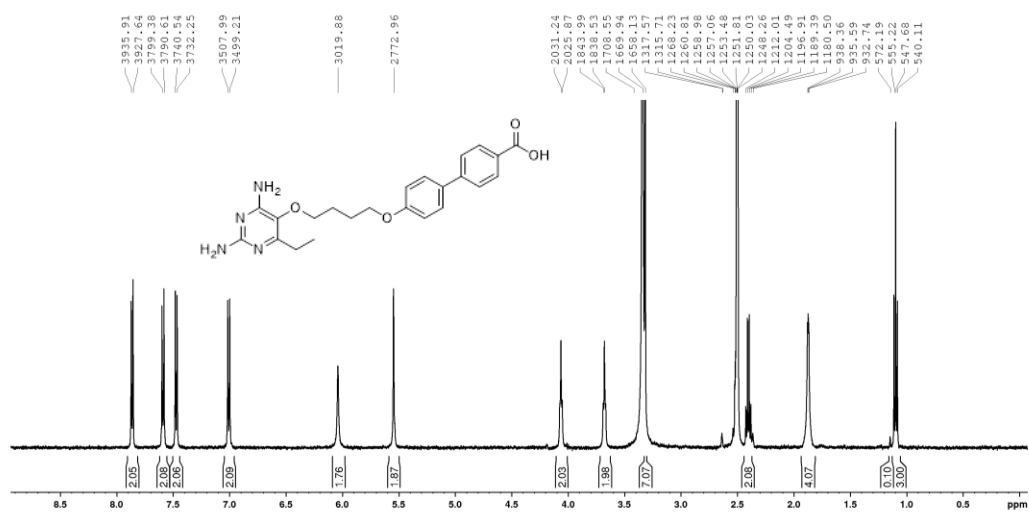

Figure S19. <sup>1</sup>H NMR spectrum of compound 21.

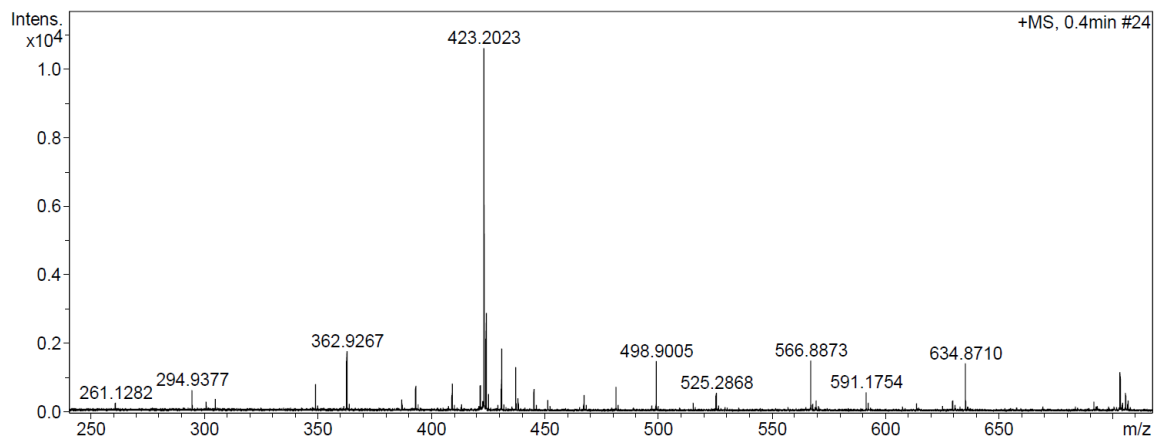

Figure S20. HRMS spectrum of compound 21.



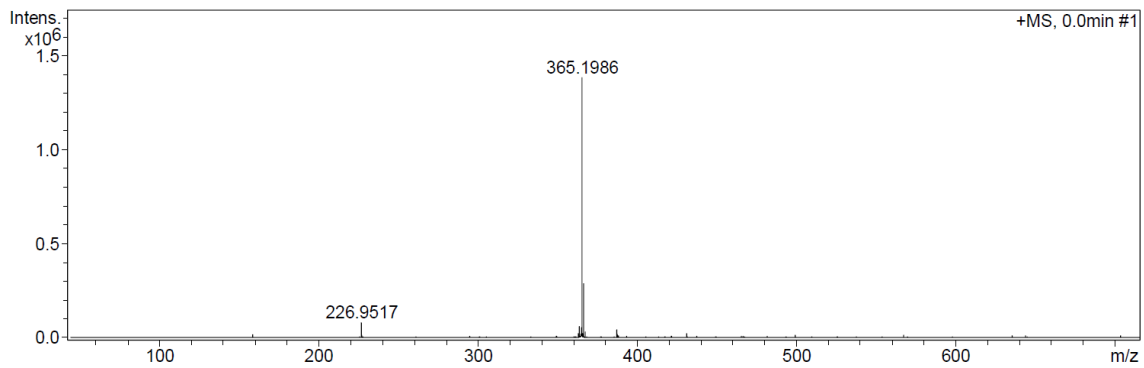

Figure S23. HRMS spectrum of compound FB1.

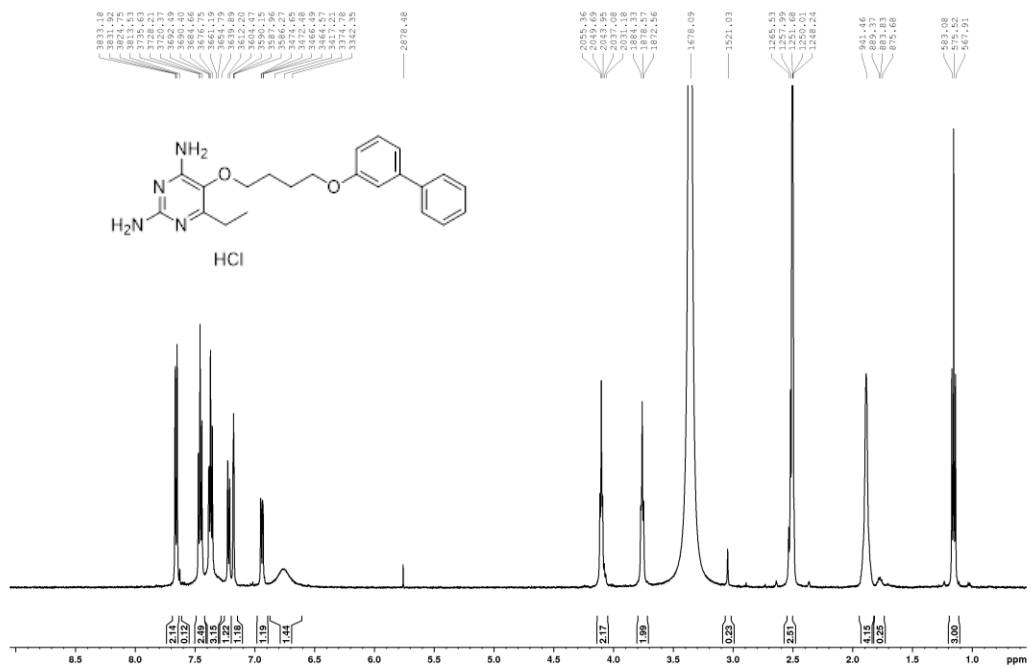

Figure S24. <sup>1</sup>H NMR spectrum of compound FB2.

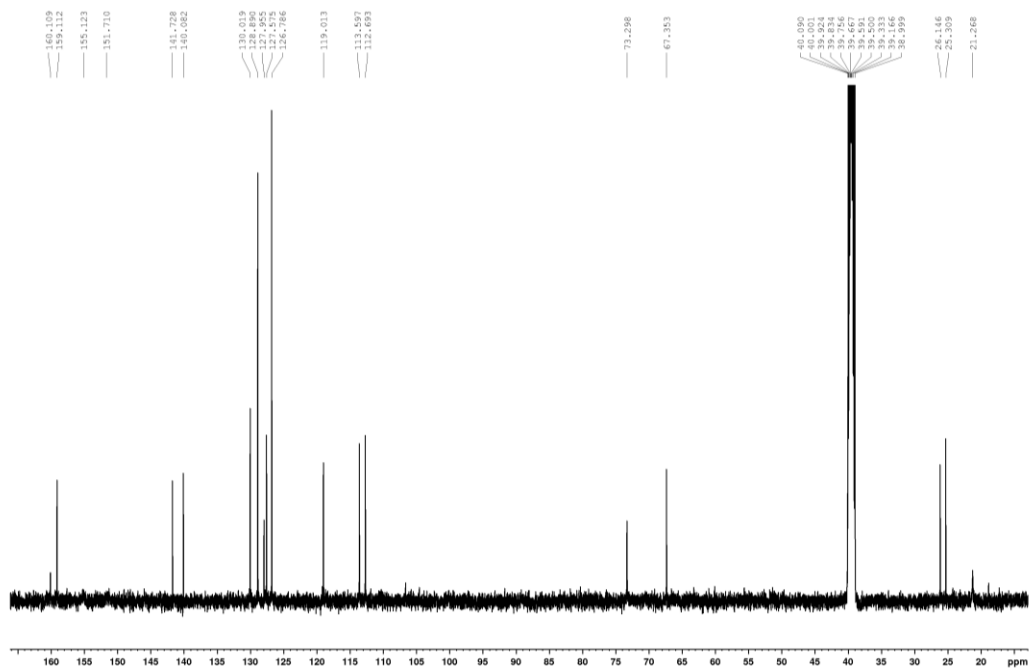

Figure S25.  $^{13}\text{C}$  NMR spectrum of compound FB2.

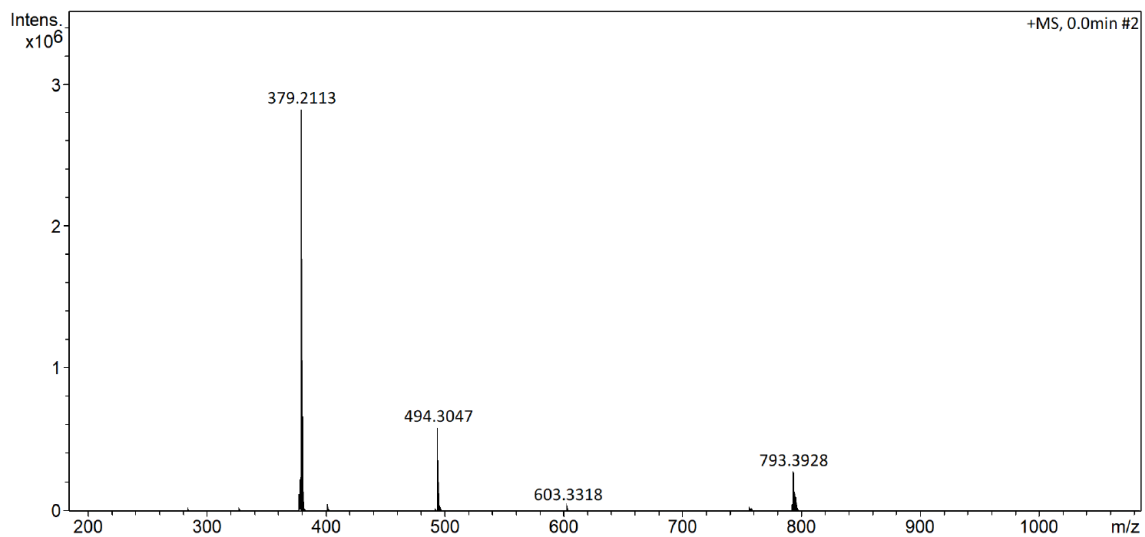

Figure S26. HRMS spectrum of compound FB2.



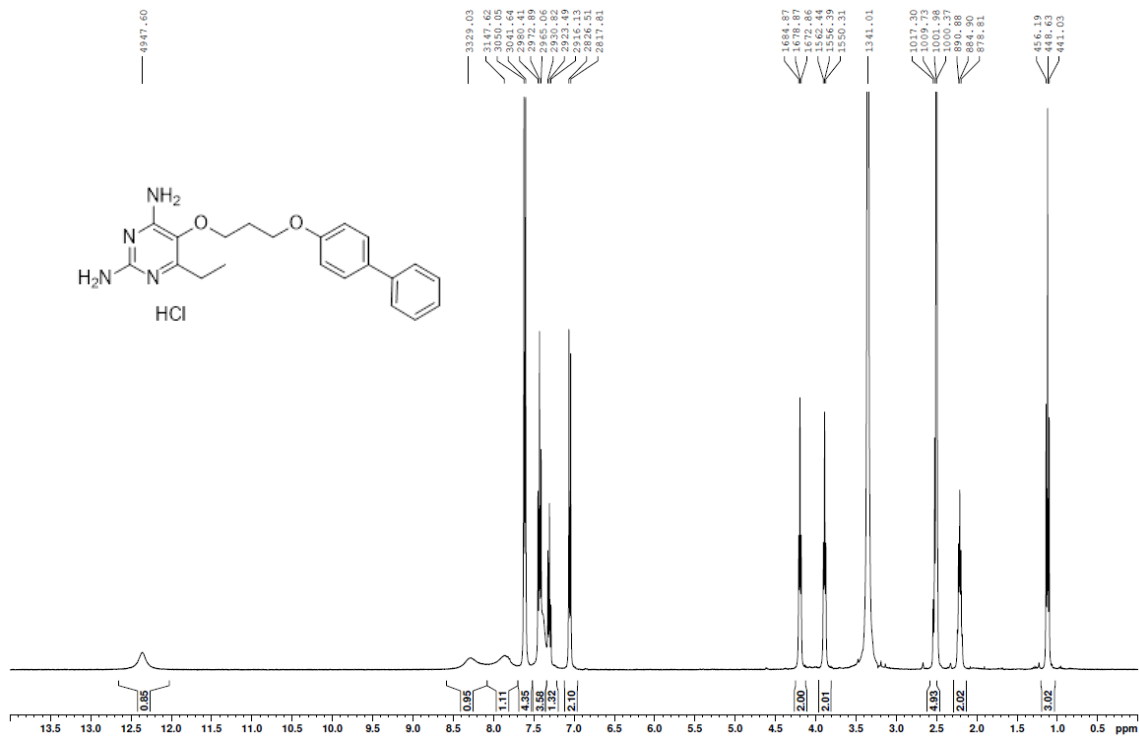

Figure S27. <sup>1</sup>H NMR spectrum of compound FB3.

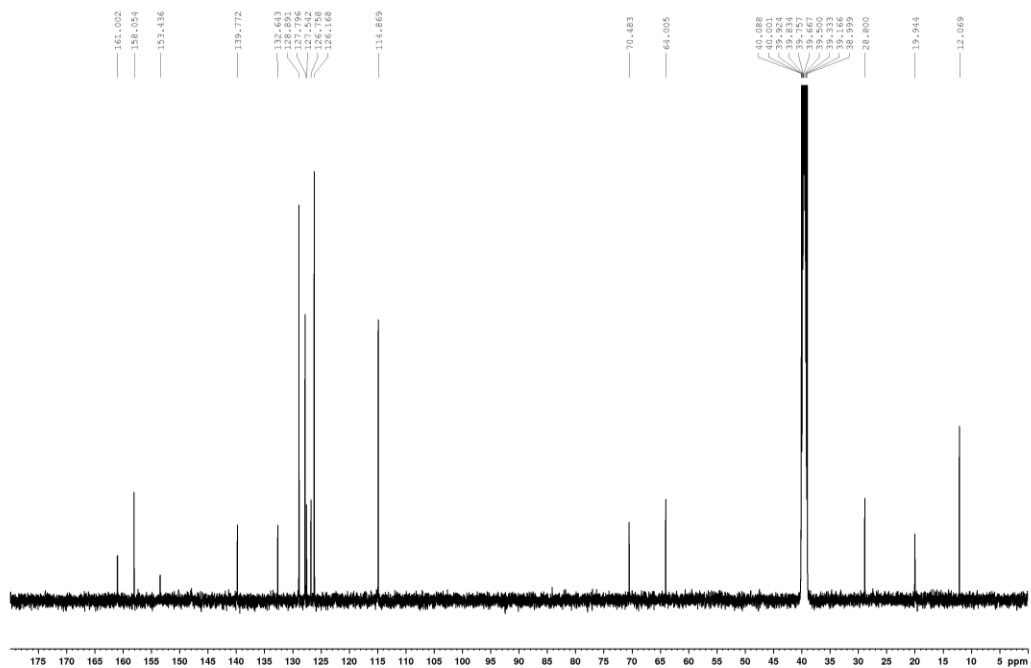

Figure S28. <sup>13</sup>C NMR spectrum of compound FB3.



Figure S29. HRMS spectrum of compound FB3.

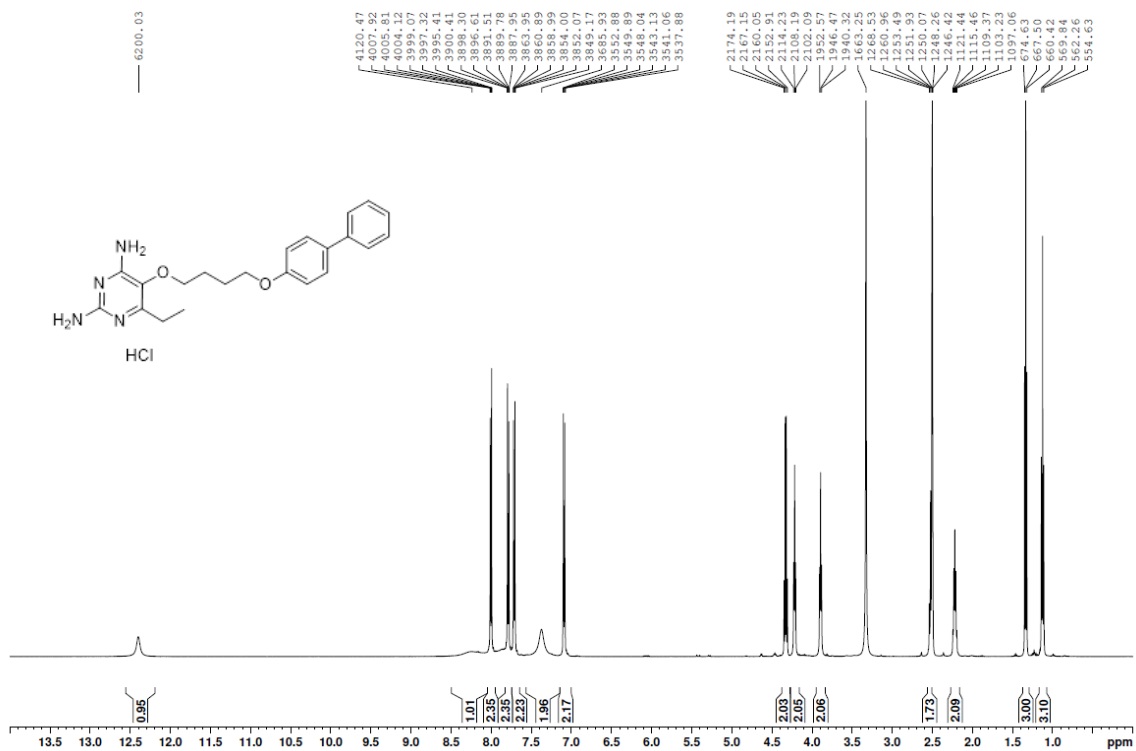

Figure S30. <sup>1</sup>H NMR spectrum of compound FB4.

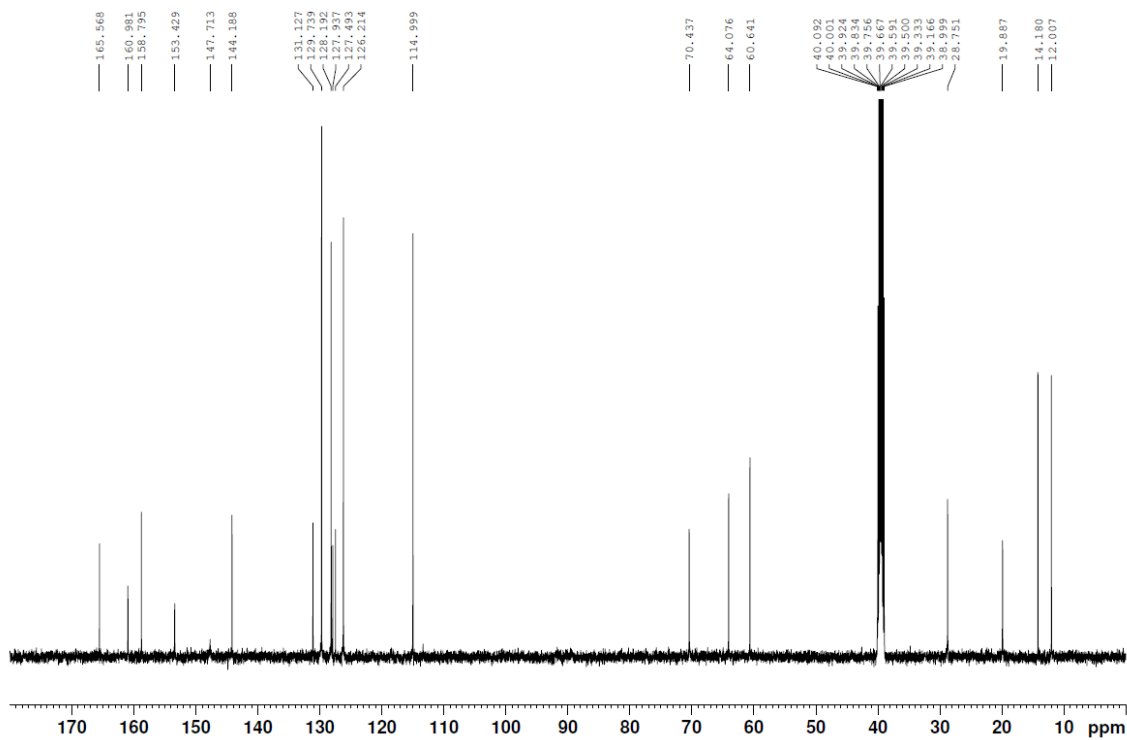

Figure S31.  $^{13}\text{C}$  NMR spectrum of compound FB4.

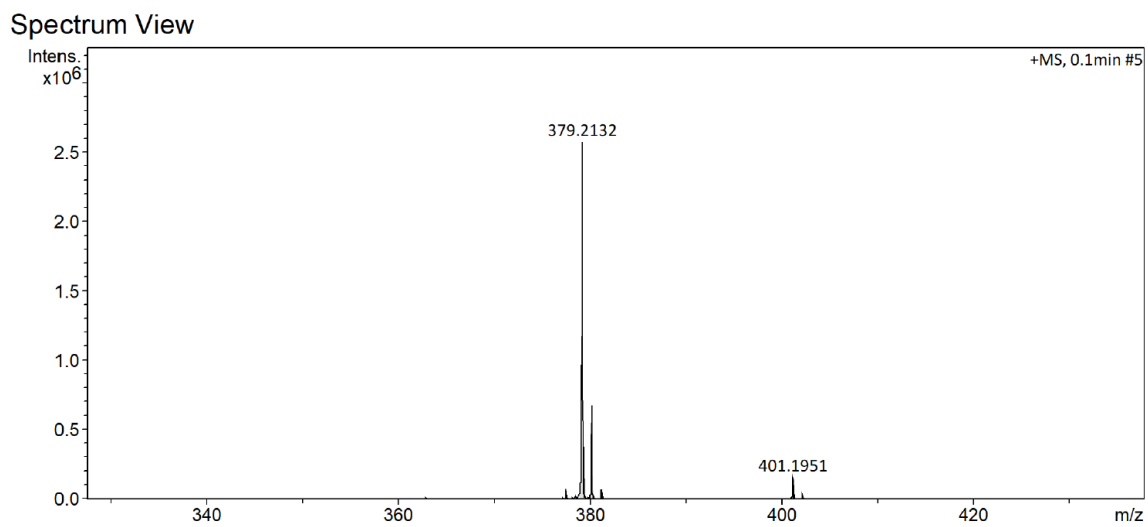

Figure S32. HRMS spectrum of compound FB4.

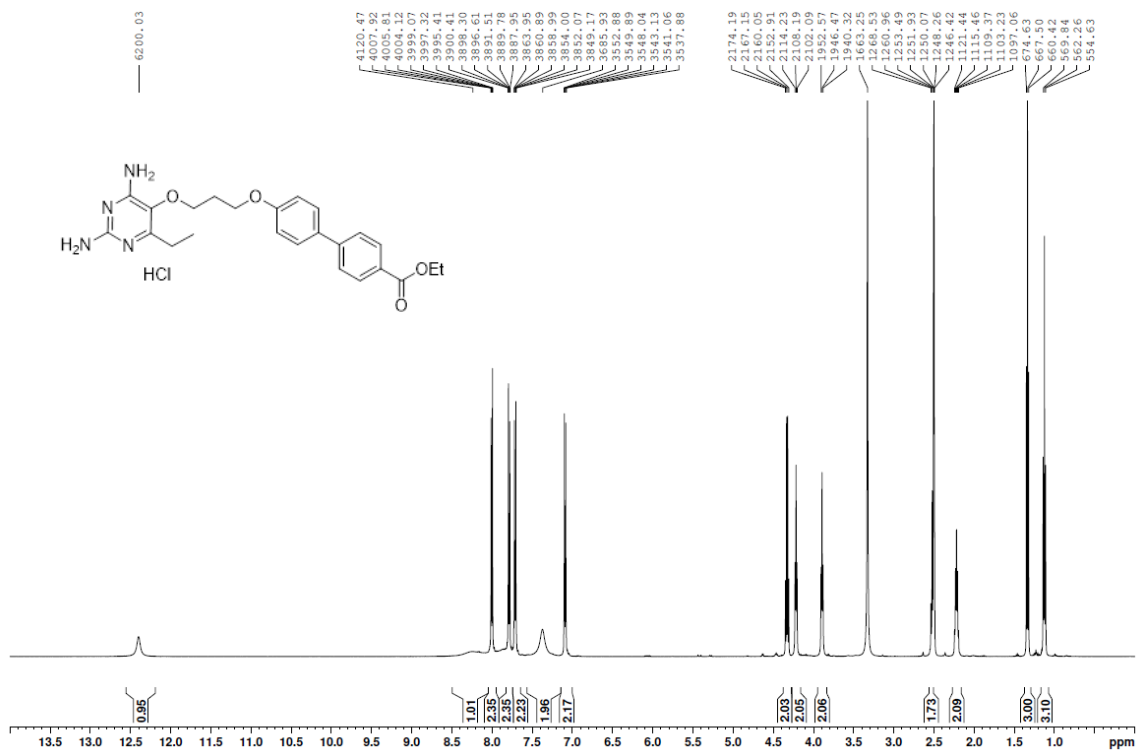

Figure S33. <sup>1</sup>H NMR spectrum of compound FB5.

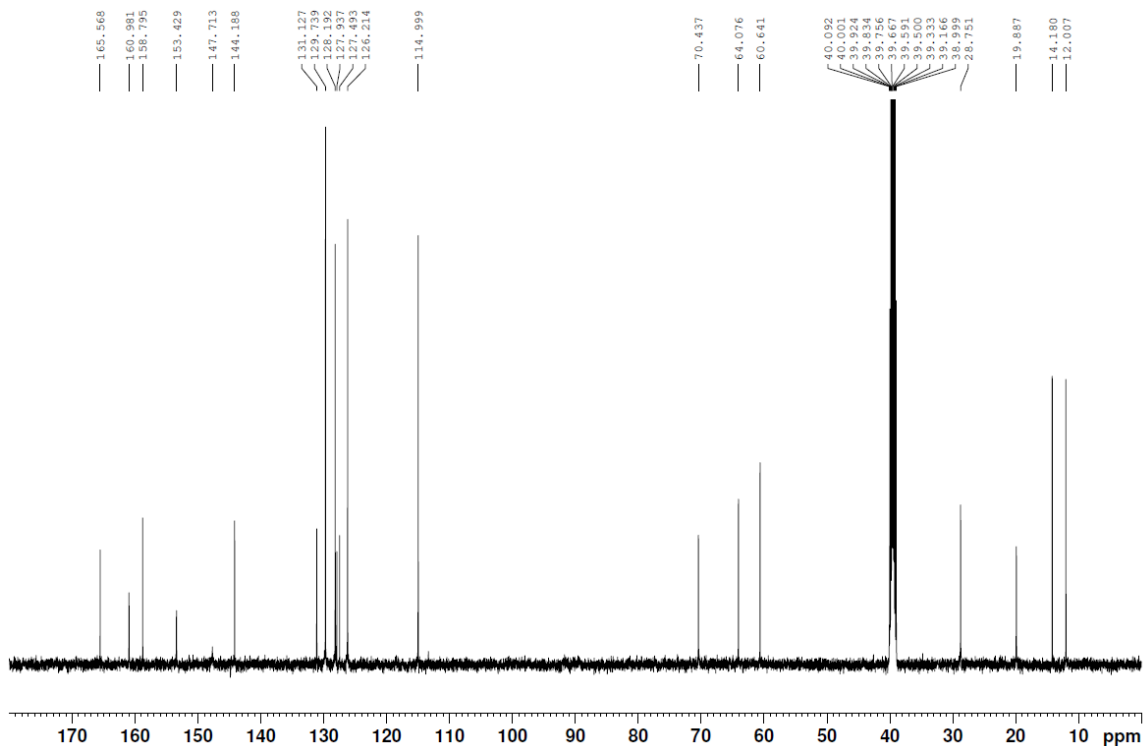

Figure S34. <sup>13</sup>C NMR spectrum of compound FB5.

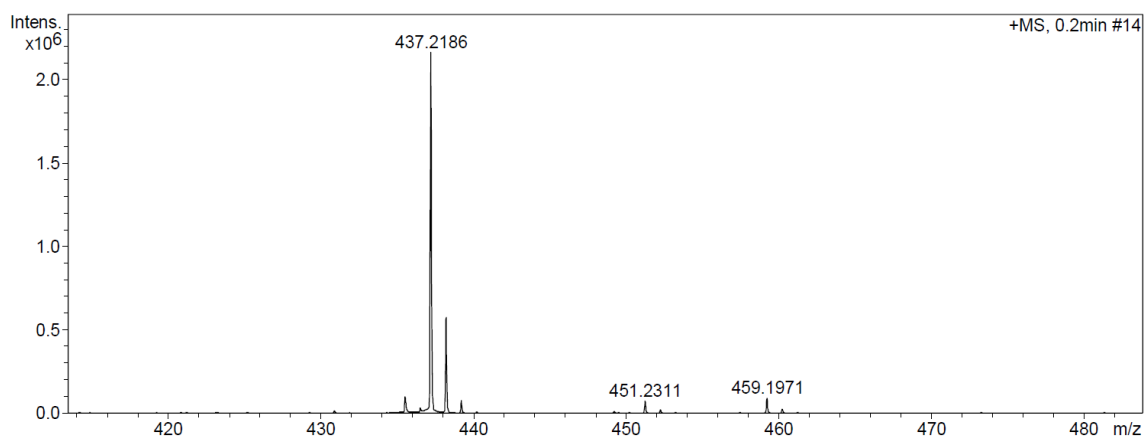

Figure S35. HRMS spectrum of compound FB5.

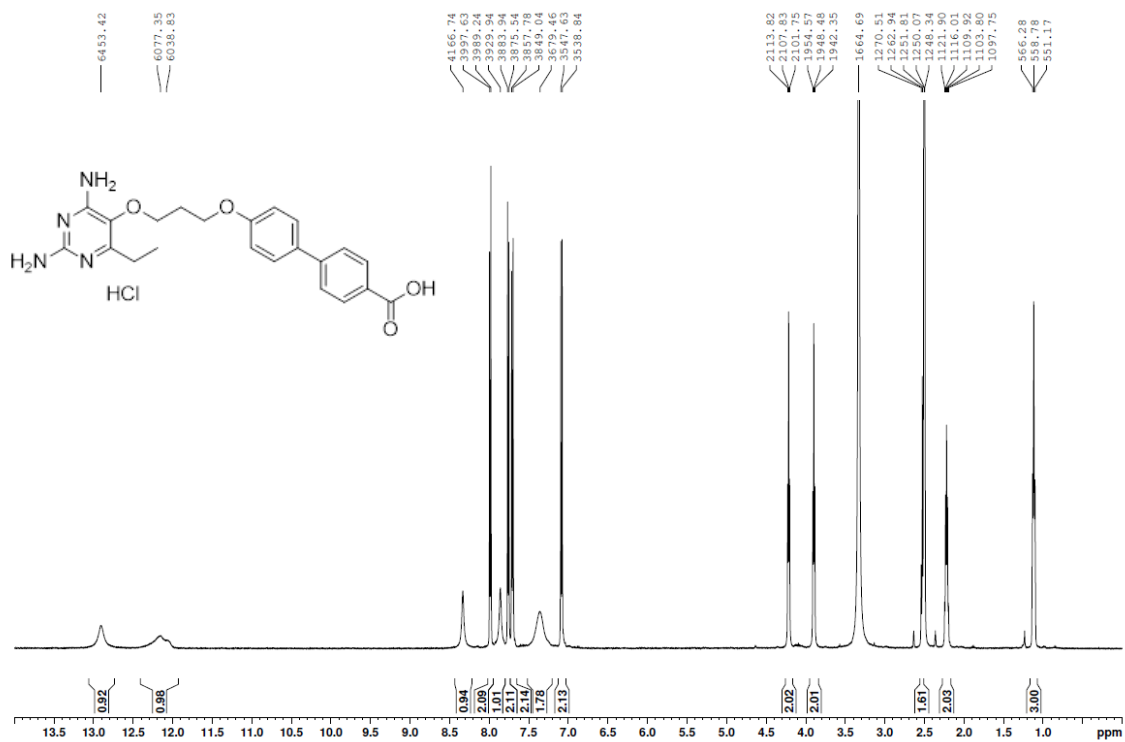

Figure S36. <sup>1</sup>H NMR spectrum of compound FB6.

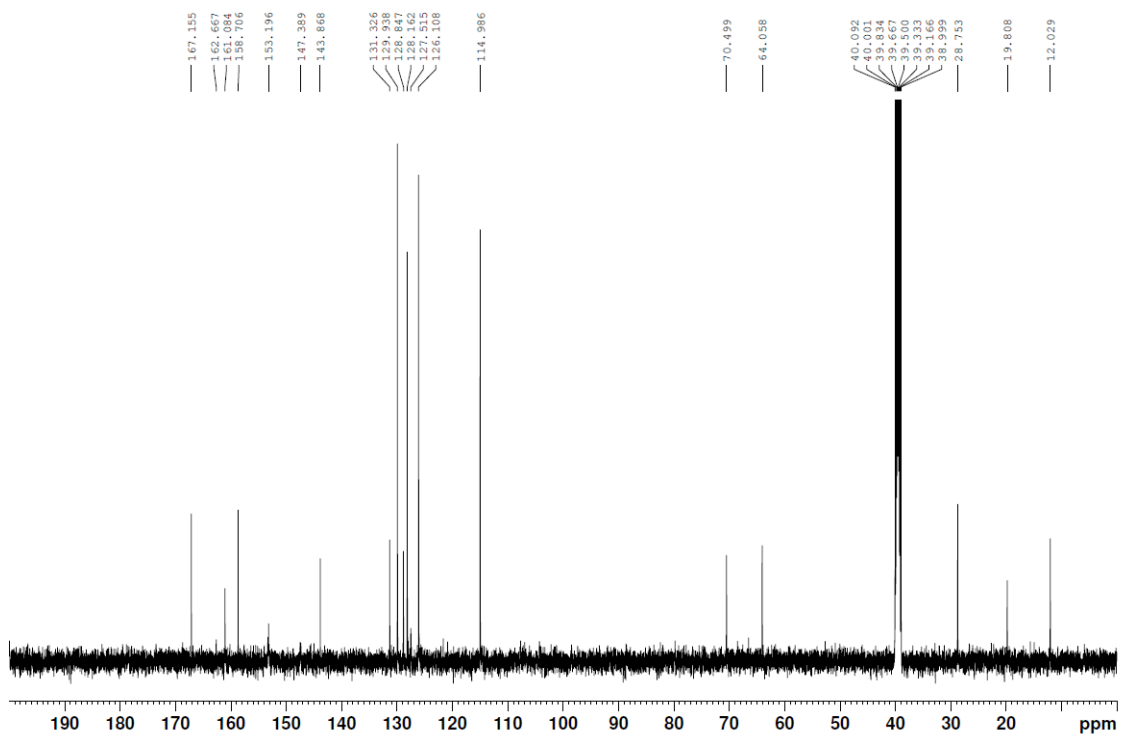

Figure S37.  $^{13}\text{C}$  NMR spectrum of compound FB6.

Spectrum View

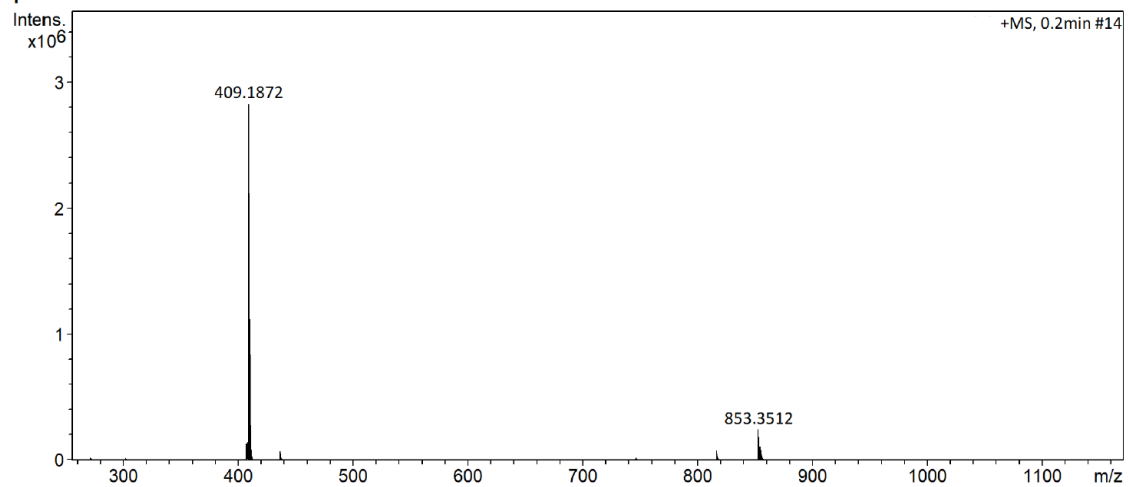

Figure S38. HRMS spectrum of compound FB6.

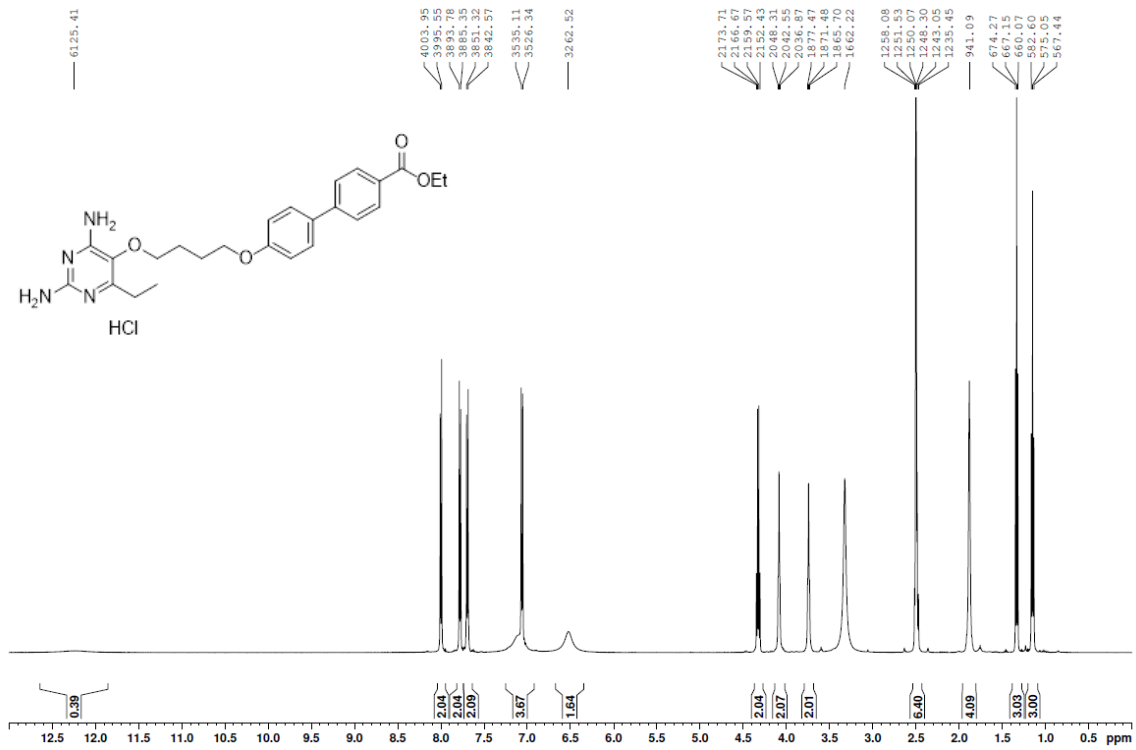

Figure S39. <sup>1</sup>H NMR spectrum of compound FB7.

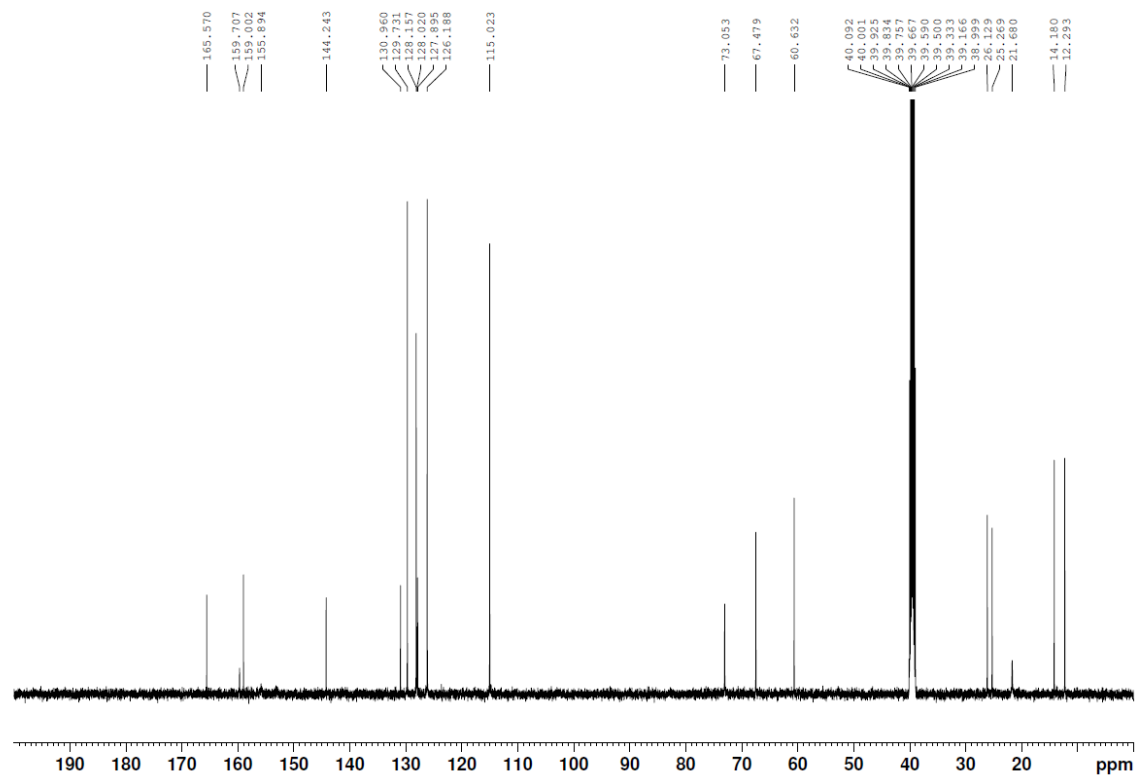

Figure S40. <sup>13</sup>C NMR spectrum of compound FB7.

Spectrum View

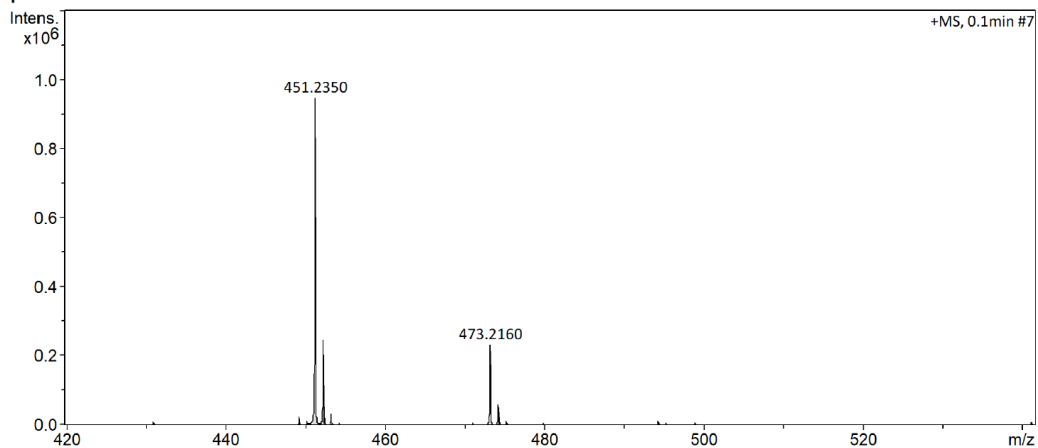

Figure S41. HRMS spectrum of compound FB7.

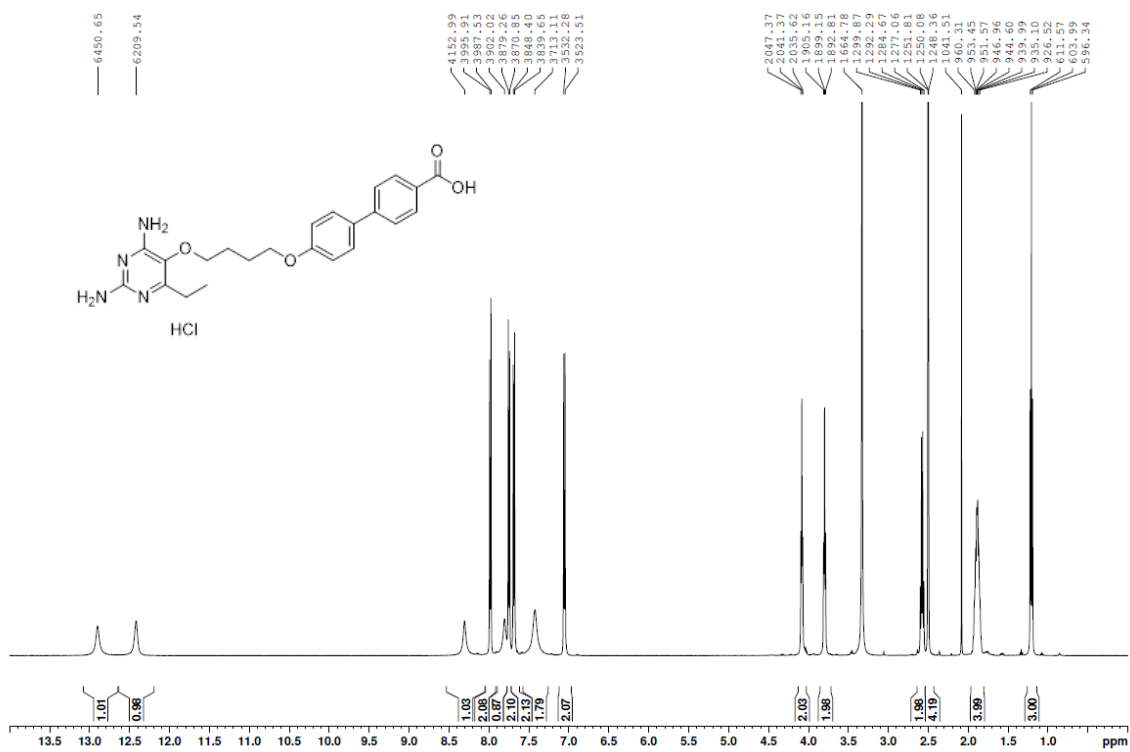

Figure S42.  $^1\text{H}$  NMR spectrum of compound FB8.



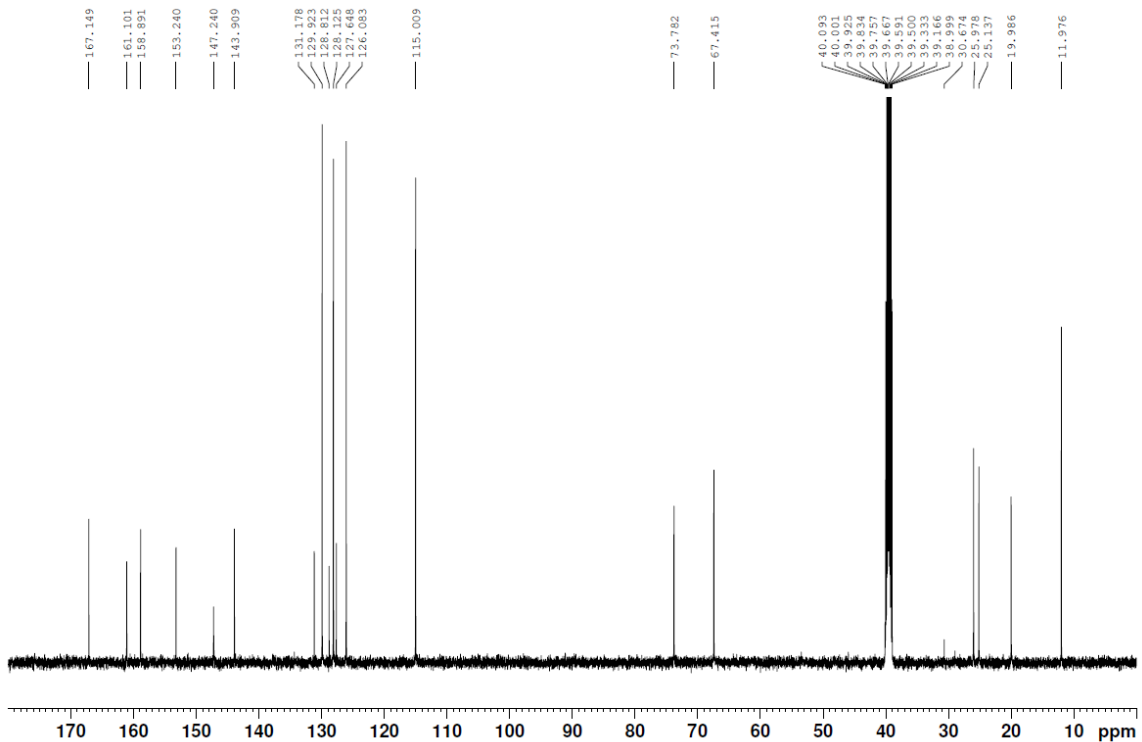

Figure S43.  $^{13}\text{C}$  NMR spectrum of compound FB8.

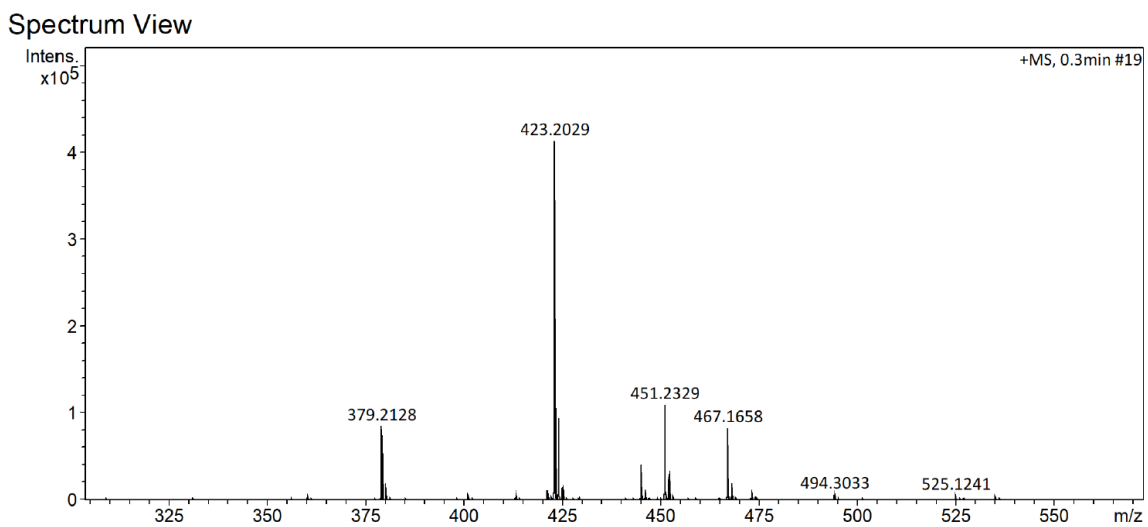

Figure S44. HRMS spectrum of compound FB8.
